# Subject Index

## Actin

- effect of microinjection of antibodies into amphibian oocytes: SCHEER 223
- maternal mRNA as determinant in ascidian embryo: JEFFERY, BATES, BEACH & TOMLINSON 1

## Activation

- of muscle gene by induction: GURDON & FAIRMAN 75

## AFP (See $\alpha$ -foetoprotein)

## Alkaline phosphatase

- maternal mRNA as determinant in ascidian embryo: JEFFERY, BATES, BEACH & TOMLINSON 1

## Amphibia

- oocyte injection of antibodies: SCHEER 223

## Androgenones

- chromosomal determinants of mouse development: SURANI, REIK, NORRIS & BARTON 123

## Anterior

- determinants in *Chironomus* eggs: KALTHOFF & ELBETIEHA 181

## Anteroposterior

- pattern in *Drosophila* embryo: FROHNHÖFER, LEHMANN & NÜSSLEIN-VOLHARD 169

## Antibody

- injection into amphibian oocyte: SCHEER 223

## Antigens

- used to study organization of *Xenopus* egg proteins: SMITH, NEFF & MALACINSKI 45

## Anti-sense RNA

- injections in frog eggs: MELTON & REBAGLIATI 211
- in *Xenopus* oocytes and embryos: COLMAN & DRUMMOND 197
- probing gene activity in *Drosophila* embryos: JÄCKLE, SEIFERT, PREISS & ROSENBERG 157

## Ascidian

- embryo maternal mRNA as determinant of tissue-specific proteins: JEFFERY, BATES, BEACH & TOMLINSON 1

## Asymmetric

- movement of cytoplasm in *Caenorhabditis* zygote: STROME 15

## Axolotl

- DNA-ligase activity in early development: SIGNORET & DAVID 85

## *Caenorhabditis elegans*

- embryo developmental strategies in early embryogenesis: SCHIERENBERG 31
- zygote asymmetric movements of cytoplasm: STROME 15

## Capping

- of RNA in *Xenopus* oocytes and embryos: COLMAN & DRUMMOND 197

## Cell division

- muscle gene activation by induction: GURDON & FAIRMAN 75

## Cell fate

- in *Caenorhabditis* zygote: STROME 15

## Cell interaction

- developmental restrictions in *Xenopus* embryos: HEASMAN, SNAPE, SMITH & WYLIE 65

## Cell lineage

- role for cytoplasmic determinants in early mouse development: JOHNSON, CHISHOLM, FLEMING & HOULISTON 97

## *Chironomus*

- microinjection of anterior determinants: KALTHOFF & ELBETIEHA 181

## Chromatin

- effect of microinjection of antibodies into amphibian oocytes: SCHEER 223

## Chromosomal

- determinants of mouse development: SURANI, REIK, NORRIS & BARTON 123
- imprinting – chromosomal determinants of mouse development: SURANI, REIK, NORRIS & BARTON 123

## Cleavage

- asymmetric movement of cytoplasm in *Caenorhabditis* zygote: STROME 15

## Commitments

- developmental restrictions in *Xenopus* embryos: HEASMAN, SNAPE, SMITH & WYLIE 65

## Compartmentments

- organization of *Xenopus* egg proteins: SMITH, NEFF & MALACINSKI 45

## Cytocortex

- role in early mouse development: JOHNSON, CHISHOLM, FLEMING & HOULISTON 97

**Cytoplasm**

transplantation in *Drosophila*: FROHNHÖFER, LEHMANN & NÜSSLEIN-VOLHARD 169

**Cytoskeleton**

asymmetric movement of cytoplasm in *Caenorhabditis* zygote: STROME 15  
organization of *Xenopus* egg proteins: SMITH, NEFF & MALACINSKI 45

**Determinant**

anterior in *Chironomus* eggs: KALTHOFF & ELBETIEHA 181  
chromosomal of mouse development: SURANI, REIK, NORRIS & BARTON 123  
cytoplasmic – role in mouse early development: JOHNSON, CHISHOLM, FLEMING & HOULISTON 97  
role of maternal mRNA in ascidian protein synthesis: JEFFERY, BATES, BEACH & TOMLINSON 1

**Determination**

developmental restrictions in *Xenopus* embryos: HEASMAN, SNAPE, SMITH & WYLIE 65  
developmental strategies in early embryogenesis of *Caenorhabditis*: SCHIERENBERG 31

**Disomy**

parental origin effects in mice: CATTANACH 137

**cDNA**

cloning – analysis of mouse spermatogenesis: WILLISON AND OTHERS 151

**DNA**

injection into *Xenopus* embryo: TRENDELENBURG AND OTHERS 243  
-ligase activity in axolotl early development: SIGNORET & DAVID 85  
methylation  
expression of retroviral vectors in transgenic mice: STEWART AND OTHERS 263

***Drosophila melanogaster***

embryo  
anteroposterior pattern: FROHNHÖFER, LEHMANN & NÜSSLEIN-VOLHARD 169  
probing gene activity: JÄCKLE, SEIFERT, PREISS & ROSENBERG 157

**Egg**

anuran  
polarity: SMITH, NEFF & MALACINSKI 45  
*Chironomus*  
microinjection of anterior determinants: KALTHOFF & ELBETIEHA 181

**Electron microscopy**

*Xenopus* embryonic nuclei and fate of injected DNA: TRENDELENBURG AND OTHERS 243

**Endoderm**

developmental restrictions in *Xenopus* embryos: HEASMAN, SNAPE, SMITH & WYLIE 65

**Expression**

of haploid gene in mouse spermatogenesis: WILLISON AND OTHERS 151

**Extraembryonic**

tissues – chromosomal determinants of mouse development: SURANI, REIK, NORRIS & BARTON 123

**Filzkörper**

as marker for gene activity changes in *Drosophila* embryos: JÄCKLE, SEIFERT, PREISS & ROSENBERG 157

 **$\alpha$ -foetoprotein**

regulation of expression in germline of mice: HAMMER AND OTHERS 257

**Frog**

egg  
anti-sense injections: MELTON & REBAGLIATI 211

**Gene**

activity in *Drosophila* embryos: JÄCKLE, SEIFERT, PREISS & ROSENBERG 157  
expression  
evidence for a multilevel regulation in axolotl: SIGNORET & DAVID 85  
in transgenic mice and murine stem cells: STEWART AND OTHERS 263  
regulation  
 $\alpha$ -foetoprotein expression in germline of mice: HAMMER AND OTHERS 257

**Germline**

mouse  
regulation of  $\alpha$ -foetoprotein minigene expression: HAMMER AND OTHERS 257

**Gynogenones**

chromosomal determinants of mouse development: SURANI, REIK, NORRIS & BARTON 123

**Haploid**

gene expression in mouse spermatogenesis: WILLISON AND OTHERS 151

**Imprinting**

chromosomal determinants of mouse development: SURANI, REIK, NORRIS & BARTON 123

- parental origin effects in mice:  
CATTANACH 137
- Induction**  
anteroposterior pattern in *Drosophila*  
embryo: FROHNHÖFER, LEHMANN &  
NÜSSELEIN-VOLHARD 169
- Interaction**  
nucleocytoplasmic in mouse embryo:  
McGRATH & SOLTER 277
- Interspecific**  
transplantation  
nucleocytoplasmic interactions in mouse  
embryo: McGRATH & SOLTER 277
- Krüppel (Kr)**  
mutation used to probe gene activity in  
*Drosophila* embryo: JÄCKLE, SEIFERT,  
PREISS & ROSENBERG 157
- Lampbrush chromosomes**  
effect of microinjection of antibodies into  
amphibian oocytes: SCHEER 223
- Laser microbeam**  
used to study the early development of  
*Caenorhabditis*: SCHIERENBERG 31
- Lethality**  
noncomplementation in mice:  
CATTANACH 137
- Light microscopy**  
*Xenopus* embryonic nuclei and fate of  
injected DNA: TRENDELEBURG AND  
OTHERS 243
- Maternal**  
chromosomes – determinants of mouse  
development: SURANI, REIK, NORRIS &  
BARTON 123  
genome contribution in mice:  
CATTANACH 137  
mRNA as determinant of ascidian tissue-  
specific proteins: JEFFERY, BATES, BEACH &  
TOMLINSON 1
- Microfilament**  
asymmetric movement of cytoplasm in  
*Caenorhabditis* zygote: STROME 15
- Microinjection**  
of anterior determinants in *Chironomus*  
eggs: KALTHOFF & ELBETIEHA 181  
of antibodies into amphibian oocytes:  
SCHEER 223  
of anti-sense RNA in frog eggs: MELTON &  
REBAGLIATI 211  
of DNA into *Xenopus* embryos:  
TRENDELEBURG AND OTHERS 243
- Monoclonal antibodies**  
used to study organization of *Xenopus* egg  
proteins: SMITH, NEFF & MALACINSKI 45
- Mouse**  
embryo  
chromosomal determinants of  
development: SURANI, REIK, NORRIS &  
BARTON 123  
nucleocytoplasmic interactions: McGRATH  
& SOLTER 277  
parental origin effects: CATTANACH 137  
role for cytoplasmic determinants in  
early development: JOHNSON,  
CHISHOLM, FLEMING & HOULISTON: 97  
genetics  
isolation of *t*-complex polypeptide-1  
gene: WILLISON AND OTHERS 151  
germline  
regulation of  $\alpha$ -foetoprotein minigene  
expression: HAMMER AND OTHERS 257  
stem cells  
expression of retroviral vectors: STEWART  
AND OTHERS 263
- Movement**  
and stability of mRNA in *Xenopus* oocytes  
and embryos: COLMAN & DRUMMOND 197  
asymmetric, of cytoplasm in *Caenorhabditis*  
zygote: STROME 15
- Muscle**  
gene activation by induction: GURDON &  
FAIRMAN 75
- Mutation**  
**Krüppel (Kr)**  
used to probe gene activity in *Drosophila*  
embryo: JÄCKLE, SEIFERT, PREISS &  
ROSENBERG 157  
*T<sup>hp</sup>*  
nucleocytoplasmic interactions in mouse  
embryo: McGRATH & SOLTER 277
- Nematode**  
*Caenorhabditis*  
developmental strategies in early  
embryogenesis: SCHIERENBERG 31  
**neo<sup>R</sup> gene**  
expression in murine stem cells and  
transgenic mice: STEWART AND  
OTHERS 263
- Noncomplementation lethality**  
parental origin effects in mice:  
CATTANACH 137
- Nuclear transfer**  
nucleocytoplasmic interactions in mouse  
embryo: McGRATH & SOLTER 277
- Nuclear transplantation**  
chromosomal determinants of mouse  
development: SURANI, REIK, NORRIS &  
BARTON 123
- Nucleocytoplasmic interaction**  
in mouse embryo: McGRATH & SOLTER 277

**Nucleus**

- amphibian oocytes
  - injection of antibodies: SCHEER 223
- maternal mRNA in ascidian development:
  - JEFFERY, BATES, BEACH & TOMLINSON 1
- Xenopus* embryo
  - structure after DNA injection:
    - TRENDELENBURG AND OTHERS 243

**Oocyte**

- amphibia
  - injection of antibodies: SCHEER 223
- frog
  - anti-sense injections: MELTON &
    - REBAGLIATI 211
- Xenopus*
  - stability and movement of mRNA:
    - COLMAN & DRUMMOND 197

**Oogenesis**

- organization of *Xenopus* egg proteins:
  - SMITH, NEFF & MALACINSKI 45

**Parental**

- genome contribution in mice:
  - CATTANACH 137

**Parthenogenones**

- chromosomal determinants of mouse
  - development: SURANI, REIK, NORRIS &
    - BARTON 123
- nucleocytoplasmic interactions in mouse
  - embryo: McGRATH & SOLTER 277

**Paternal**

- chromosomes – determinants of mouse
  - development: SURANI, REIK, NORRIS &
    - BARTON 123

**Pattern**

- anteroposterior pattern in *Drosophila*
  - embryo: FROHNHÖFER, LEHMANN &
    - NÜSSLEIN-VOLHARD 169

**Phenotypic rescue**

- probing gene activity in *Drosophila*
  - embryos: JÄCKLE, SEIFERT, PREISS &
    - ROSENBERG 157

**Platelet**

- yolk
  - organization of *Xenopus* egg proteins:
    - SMITH, NEFF & MALACINSKI 45

**Polarity**

- anteroposterior pattern in *Drosophila*
  - embryo: FROHNHÖFER, LEHMANN &
    - NÜSSLEIN-VOLHARD 169
- developmental strategies in early
  - embryogenesis of *Caenorhabditis*:
    - SCHIERENBERG 31
- in *Xenopus* egg: SMITH, NEFF &
  - MALACINSKI 45

- role for cytoplasmic determinants in early
  - mouse development: JOHNSON,
    - CHISHOLM, FLEMING & HOULISTON 97

**Polyadenylation**

- stability and movement of mRNA in
  - Xenopus* oocytes and embryos: COLMAN &
    - DRUMMOND 197

**Poly (A) RNA**

- in *Xenopus* oocytes and embryos: COLMAN
  - & DRUMMOND 197

**Prelocalization**

- developmental strategies in early
  - embryogenesis of *Caenorhabditis*:
    - SCHIERENBERG 31

**Protein**

- ascidian
  - role of maternal mRNA: JEFFERY, BATES,
    - BEACH & TOMLINSON 1
- Xenopus* egg
  - organization of yolk/nonyolk proteins:
    - SMITH, NEFF & MALACINSKI 45

**Regulation**

- multilevel – DNA-ligase activity in axolotl
  - early development: SIGNORET &
    - DAVID 85
- of  $\alpha$ -foetoprotein expression in mice:
  - HAMMER AND OTHERS 257

**Retroviral vectors**

- expression in murine stem cells and
  - transgenic mice: STEWART AND
    - OTHERS 263

**RNA**

- anti-sense – injection in frog eggs: MELTON
  - & REBAGLIATI 211
- maternal messenger
  - as determinant of ascidian tissue-specific
    - proteins: JEFFERY, BATES, BEACH &
      - TOMLINSON 1
- messenger
  - localization in frog eggs: MELTON &
    - REBAGLIATI 211
  - stability and movement in *Xenopus*
    - oocytes and embryos: COLMAN &
      - DRUMMOND 197
  - probing gene activity in *Drosophila*
    - embryos: JÄCKLE, SEIFERT, PREISS &
      - ROSENBERG 157

**RNA polymerases**

- effect of microinjection of antibodies into
  - amphibian oocytes: SCHEER 223

**Robertsonian translocation**

- parental origin effects in mice:
  - CATTANACH 137

**Segmentation**

probing gene activity in *Drosophila*  
embryos: JÄCKLE, SEIFERT, PREISS &  
ROSENBERG 157

**Spermatogenesis**

isolation of *t*-complex polypeptide-1 gene  
in mouse: WILLISON AND OTHERS 151

**Stability**

and movement of mRNA in *Xenopus*  
oocytes and embryos: COLMAN &  
DRUMMOND 197

**Stem cells**

mouse  
expression of retroviral vectors: STEWART  
AND OTHERS 263

***Styela plicata***

embryo  
maternal mRNA as determinant of  
tissue-specific proteins: JEFFERY, BATES,  
BEACH & TOMLINSON 1

**Symmetry**

developmental strategies in early  
embryogenesis of *Caenorhabditis*:  
SCHIERENBERG 31

**Testis**

mouse  
isolation of *t*-complex polypeptide-1  
gene: WILLISON AND OTHERS 151

***t*-haplotypes**

molecular analysis of mouse  
spermatogenesis: WILLISON AND  
OTHERS 151

***T<sup>hp</sup>* mutation**

nucleocytoplasmic interactions in mouse  
embryo: McGRATH & SOLTER 277

**Transcription**

effect of microinjection of antibodies into  
amphibian oocytes: SCHEER 223

**Transgenic mice**

expression of retroviral vectors: STEWART  
AND OTHERS 263

regulation of  $\alpha$ -foetoprotein minigene  
expression: HAMMER AND OTHERS 257

**Transplantation**

nucleocytoplasmic interactions in mouse  
embryo: McGRATH & SOLTER 277  
of anterior determinants in *Chironomus*  
eggs: KALTHOFF & ELBETIEHA 181

**Vegetal pole**

developmental restrictions in *Xenopus*  
embryos: HEASMAN, SNAPE, SMITH &  
WYLIE 65

***Xenopus laevis***

egg  
muscle gene activation by induction:  
GURDON & FAIRMAN 75

**embryo**

DNA injection: TRENDELENBURG AND  
OTHERS 243

nature of commitment: HEASMAN, SNAPE,  
SMITH & WYLIE 65

organization of oogenetically derived  
proteins: SMITH, NEFF &  
MALACINSKI 45

**oocyte**

stability and movement of mRNA:  
COLMAN & DRUMMOND 197

**X-inactivation**

regulation of  $\alpha$ -foetoprotein minigene  
expression in mice: HAMMER AND  
OTHERS 257

**Yolk**

organization of *Xenopus* egg proteins:  
SMITH, NEFF & MALACINSKI 45

**Zygote*****Caenorhabditis***

asymmetric movements of cytoplasm:  
STROME 15
